# Supplementary material for: Tailored piezoelectric chitosan thin film for ultrasound-controlled drug delivery
Source: Research Square preprint supplement (doi:10.21203/rs.3.rs-7544848/v1), 2025-09-10
Supplement: Supplementary file 1 [file 1d7e783c3c37c11843e3349e.docx]

**Tailored piezoelectric chitosan thin film for ultrasound-controlled drug delivery**

Gaia de Marzoa,b, Valentina Antonacia, Virgilio Brunettia, Laura Blasia,c, Luca Fachechia, Sergio Marrasd, Antonio Qualtieria, Francesco Rizzia, Roberto Fiammengoe, Massimo De Vittorioa,b

aIstituto Italiano di Tecnologia—Center for Biomolecular Nanotechnologies, Lecce 73010, Italy

bCenter IDUN, Department of Health Technology, Technical University of Denmark, Kongens Lyngby 2800, Denmark

cCNR-IMM Istituto per la Microelettronica ed i Microsistemi - UOS di Lecce c/o Campus Universitario Ecotekne, Lecce 73100, Italy.

d Materials Characterization Facility, Istituto Italiano di Tecnologia (IIT), Via Morego 30, 16163, Genova, Italy

eDepartment of Biotechnology, University of Verona, Strada Le Grazie 15, Verona 37134, Italy.

Supplementary figure S1:


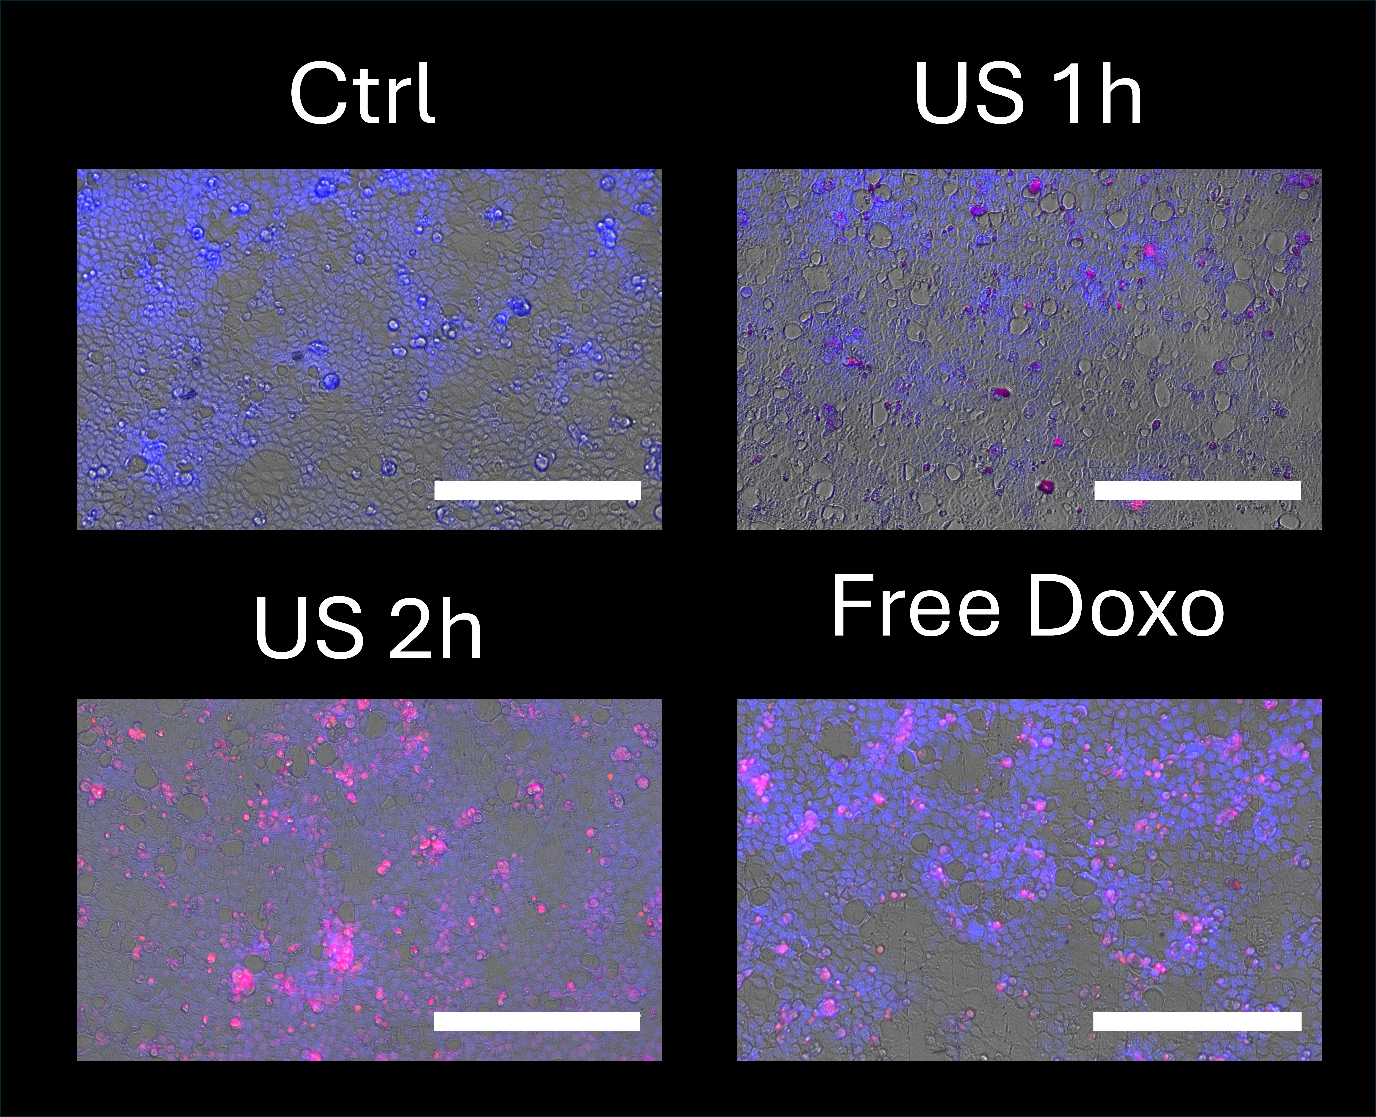


Figure S1: Merged images of the Hoechst 33258 distribution, Doxorubicin distribution and transmission image of Caco-2 cells after 48 h of treatment.
